# Supplementary material for: Development and Potential Application of Ras Domain Containing Protein from Haemonchus contortus for Diagnosis of Goat Infection
Source: MDPI journal article supplement (doi:10.3390/ani10010138), 2020-01-15
Supplement: s1 [file s1]

# Development and Potential Application of Ras Domain-Containing Protein from *Haemonchus contortus* for Diagnosis of Goat Infection

Kalibixiati Aimulajiang, Man Cao, Shuyi Liao, Muhammad Ali-ul-Husnain Naqvi, Xiaowei Tian, Zehua Li, Mingmin Lu, Shakeel Ahmed Lakho, Xiangrui Li, Lixin Xu, Xiaokai Song and Ruofeng Yan \*

**Table 1.** Reactions between rHcRas and serum from goat infected with *H. contortus*.

| DPI | 1 | 2 | 3 | 4 | 5 |
|-----|---|---|---|---|---|
| 0   | — | — | — | — | — |
| 7   | — | — | — | — | — |
| 14  | — | — | + | + | + |
| 21  | + | + | + | + | + |
| 35  | + | + | + | + | + |
| 49  | + | + | + | + | + |
| 63  | + | + | + | + | + |
| 85  | + | + | + | + | + |
| 103 | + | + | + | + | + |

Reactions between rHcRas and serum from goat (n = 5) infected with *H. contortus* were tested by WB, “+” represent positive reaction and “—” as negative.

**Table 2.** Repeatability of the indirect ELISA.

| Intra-assay   | P1            | P2            | P3           | N1            | N2            | N3           |
|---------------|---------------|---------------|--------------|---------------|---------------|--------------|
| R1            | 0.439         | 0.559         | 0.658        | 0.329         | 0.305         | 0.305        |
| R2            | 0.466         | 0.469         | 0.62         | 0.277         | 0.27          | 0.283        |
| R3            | 0.425         | 0.47          | 0.592        | 0.275         | 0.244         | 0.306        |
| Mean          | 0.443         | 0.499         | 0.623        | 0.294         | 0.273         | 0.298        |
| SD            | 0.021         | 0.052         | 0.033        | 0.031         | 0.031         | 0.013        |
| <b>CV (%)</b> | <b>4.701</b>  | <b>10.349</b> | <b>5.314</b> | <b>11.215</b> | <b>10.272</b> | <b>4.815</b> |
| Inter-assay   | P4            | P5            | P6           | N4            | N5            | N6           |
| R-1           | 0.328         | 0.468         | 0.578        | 0.291         | 0.315         | 0.297        |
| R-2           | 0.371         | 0.506         | 0.516        | 0.288         | 0.261         | 0.311        |
| R-3           | 0.299         | 0.445         | 0.502        | 0.231         | 0.231         | 0.261        |
| Mean          | 0.333         | 0.473         | 0.532        | 0.270         | 0.269         | 0.290        |
| SD            | 0.036         | 0.031         | 0.040        | 0.034         | 0.043         | 0.026        |
| <b>CV (%)</b> | <b>10.890</b> | <b>6.513</b>  | <b>7.603</b> | <b>12.568</b> | <b>14.695</b> | <b>8.250</b> |

Positive (P1, P2 and P3) and negative samples (N1, N2 and N3) were tested by indirect ELISA in the same plate by three repeats (R1, R2 and R3). Another positive (P4, P5 and P6) and negative samples (N4, N5 and N6) were tested in three different plates (R-1, R-2 and R-3). The coefficient of variation (CV) was showed as bold.
